# Supplementary material
Source: MDPI journal article supplement (https://www.mdpi.com/2674-0710/1/2/15)
Supplement: s1 [file s1]

Code: .....

Initials: .....

Date: ... / ... / .....

## Supplementary file S1:

## QUESTIONNAIRE

**WILLINGNESS TO GET TESTED FOR HIV/AIDS AND ASSOCIATED FACTORS AMONG FIRST YEAR STUDENTS OF UNIVERSITY OF HEALTH AND ALLIED SCIENCES, HO.**

| <b>SECTION A: SOCIO-DEMOGRAPHIC CHARACTERISTICS</b>                        |                                                    |                                                             |                                                                 |                                         |  |
|----------------------------------------------------------------------------|----------------------------------------------------|-------------------------------------------------------------|-----------------------------------------------------------------|-----------------------------------------|--|
| <i>For this section, please tick the option that only applies to you</i>   |                                                    |                                                             |                                                                 |                                         |  |
| 1                                                                          | Age (years)                                        |                                                             |                                                                 |                                         |  |
| 2                                                                          | Sex                                                | Male <input type="checkbox"/>                               | Female <input type="checkbox"/>                                 |                                         |  |
| 3                                                                          | Religion                                           | Christianity <input type="checkbox"/>                       | Islam <input type="checkbox"/>                                  |                                         |  |
|                                                                            |                                                    | African Traditional religion <input type="checkbox"/>       |                                                                 |                                         |  |
|                                                                            |                                                    | Other <input type="checkbox"/>                              |                                                                 |                                         |  |
| 4                                                                          | Marital status                                     | Single <input type="checkbox"/>                             | Married <input type="checkbox"/>                                |                                         |  |
|                                                                            |                                                    | Divorced <input type="checkbox"/>                           | Widowed <input type="checkbox"/>                                |                                         |  |
| 5                                                                          | School                                             | SOM <input type="checkbox"/>                                | SONAM <input type="checkbox"/>                                  | SOSEM <input type="checkbox"/>          |  |
|                                                                            |                                                    | SBBS <input type="checkbox"/>                               | SOP <input type="checkbox"/>                                    | SAHS <input type="checkbox"/>           |  |
| 6                                                                          | Hall of residence                                  | University owned <input type="checkbox"/>                   | Private <input type="checkbox"/>                                |                                         |  |
| 7                                                                          | Educational support                                | Parents <input type="checkbox"/>                            | Guardian <input type="checkbox"/>                               | Philanthropist <input type="checkbox"/> |  |
|                                                                            |                                                    | Extended family member                                      |                                                                 |                                         |  |
|                                                                            |                                                    | Father only <input type="checkbox"/>                        | Mother only <input type="checkbox"/>                            |                                         |  |
| 8                                                                          | Ethnicity                                          | Ewe <input type="checkbox"/>                                | Akan <input type="checkbox"/>                                   | Ga <input type="checkbox"/>             |  |
|                                                                            |                                                    | Northern <input type="checkbox"/>                           | Guan <input type="checkbox"/>                                   | Other <input type="checkbox"/>          |  |
| 9                                                                          | Marital status of parents                          | Married <input type="checkbox"/>                            | Divorced <input type="checkbox"/>                               | Single <input type="checkbox"/>         |  |
|                                                                            |                                                    | Widowed <input type="checkbox"/>                            |                                                                 |                                         |  |
| 10                                                                         | Place of usual residence outside campus            | Urban <input type="checkbox"/>                              | Rural <input type="checkbox"/>                                  |                                         |  |
| <b>B: KNOWLEDGE ABOUT HIV/AIDS</b>                                         |                                                    |                                                             |                                                                 |                                         |  |
| <i>For this section, please tick all options you think are appropriate</i> |                                                    |                                                             |                                                                 |                                         |  |
| 11                                                                         | What causes HIV/AIDS?                              | Genetically acquired <input type="checkbox"/>               | Virus <input type="checkbox"/>                                  |                                         |  |
|                                                                            |                                                    | Bacteria <input type="checkbox"/>                           | Fungi <input type="checkbox"/>                                  |                                         |  |
|                                                                            |                                                    | Don't know <input type="checkbox"/>                         |                                                                 |                                         |  |
| 12                                                                         | Which age group can get infected?                  | Children only <input type="checkbox"/>                      | Adolescents only <input type="checkbox"/>                       |                                         |  |
|                                                                            |                                                    | Elderly only <input type="checkbox"/>                       | Young adults only <input type="checkbox"/>                      |                                         |  |
|                                                                            |                                                    | Adults only <input type="checkbox"/>                        | Everyone <input type="checkbox"/>                               |                                         |  |
|                                                                            |                                                    | Don't know <input type="checkbox"/>                         |                                                                 |                                         |  |
| 13                                                                         | How is HIV/AIDS transmitted?                       | Through unprotected sex <input type="checkbox"/>            | Sharing of sharps <input type="checkbox"/>                      |                                         |  |
|                                                                            |                                                    | Sexual intercourse <input type="checkbox"/>                 | Blood transfusion <input type="checkbox"/>                      |                                         |  |
|                                                                            |                                                    | Mother to child <input type="checkbox"/>                    | Witchcraft <input type="checkbox"/>                             |                                         |  |
|                                                                            |                                                    | Don't know <input type="checkbox"/>                         | Other <input type="checkbox"/>                                  |                                         |  |
| 14                                                                         | What are the symptoms of HIV/AIDS?                 | Consistent weight loss <input type="checkbox"/>             | Opportunistic infections <input type="checkbox"/>               |                                         |  |
|                                                                            |                                                    | Recurring fever <input type="checkbox"/>                    | Profuse night sweats <input type="checkbox"/>                   |                                         |  |
|                                                                            |                                                    | Sores in mouth, anus or genitals <input type="checkbox"/>   | Don't know <input type="checkbox"/>                             |                                         |  |
| 15                                                                         | How can one prevent oneself from getting HIV/AIDS? | Condom use during sex <input type="checkbox"/>              | Avoid sharing of sharps <input type="checkbox"/>                |                                         |  |
|                                                                            |                                                    | Blood screening before transfusion <input type="checkbox"/> | Being faithful to one's sexual partner <input type="checkbox"/> |                                         |  |
|                                                                            |                                                    | Don't know <input type="checkbox"/>                         | Other <input type="checkbox"/>                                  |                                         |  |

Code: .....

Initials: .....

Date: ... / ... / .....

|                                                                              |                                                                            |                                                                                |                                                      |
|------------------------------------------------------------------------------|----------------------------------------------------------------------------|--------------------------------------------------------------------------------|------------------------------------------------------|
| 16                                                                           | How is HIV/AIDS treated?                                                   | Lifelong antiretroviral therapy <input type="checkbox"/>                       | Blood cleansing (dialysis) <input type="checkbox"/>  |
|                                                                              |                                                                            | Sleeping with virgins <input type="checkbox"/>                                 | Sacrificing to the Gods <input type="checkbox"/>     |
|                                                                              |                                                                            | Don't know <input type="checkbox"/>                                            |                                                      |
| 17                                                                           | How can one's HIV status be proven?                                        | Through revelation <input type="checkbox"/>                                    | Clinical signs and symptoms <input type="checkbox"/> |
|                                                                              |                                                                            | Through lab testing <input type="checkbox"/>                                   | Don't know <input type="checkbox"/>                  |
| 18                                                                           | What is your main source of information?                                   | TV <input type="checkbox"/>                                                    | Radio <input type="checkbox"/>                       |
|                                                                              |                                                                            | Family <input type="checkbox"/>                                                | School <input type="checkbox"/>                      |
|                                                                              |                                                                            | Haven't heard about it before <input type="checkbox"/>                         | Friends <input type="checkbox"/>                     |
|                                                                              |                                                                            |                                                                                | Workshop <input type="checkbox"/>                    |
| <b>SECTION C-EVER TESTED FOR HIV/AIDS?</b>                                   |                                                                            |                                                                                |                                                      |
| <i>Please tick only the options applicable to you</i>                        |                                                                            |                                                                                |                                                      |
| 19                                                                           | Have you ever tested for HIV?                                              | Yes <input type="checkbox"/>                                                   | No <input type="checkbox"/>                          |
| 20                                                                           | When was the last time you got tested?                                     | Within the last 6 months <input type="checkbox"/>                              | Within the last 12 months <input type="checkbox"/>   |
|                                                                              |                                                                            | More than a year ago <input type="checkbox"/>                                  | Not applicable <input type="checkbox"/>              |
| 21                                                                           | Where did you get tested?                                                  | Hospital <input type="checkbox"/>                                              | Health centre <input type="checkbox"/>               |
|                                                                              |                                                                            | Private clinic <input type="checkbox"/>                                        | Church <input type="checkbox"/>                      |
|                                                                              |                                                                            |                                                                                | Not applicable <input type="checkbox"/>              |
| 22                                                                           | Were you counselled prior to testing?                                      | Yes <input type="checkbox"/>                                                   | No <input type="checkbox"/>                          |
|                                                                              |                                                                            |                                                                                | Not applicable <input type="checkbox"/>              |
| 23                                                                           | What informed your decision to test?                                       | Marriage <input type="checkbox"/>                                              | Health worker request <input type="checkbox"/>       |
|                                                                              |                                                                            | High risk (sexually active, drug user etc) <input type="checkbox"/>            |                                                      |
|                                                                              |                                                                            | History of rape <input type="checkbox"/>                                       | Other <input type="checkbox"/>                       |
|                                                                              |                                                                            | Not applicable <input type="checkbox"/>                                        |                                                      |
| 24                                                                           | If NO, why have you not yet tested for HIV?                                | Not sexually active <input type="checkbox"/>                                   | Stigma <input type="checkbox"/>                      |
|                                                                              |                                                                            | Lack of confidentiality on the part of health workers <input type="checkbox"/> |                                                      |
|                                                                              |                                                                            | Fear of positive HIV results <input type="checkbox"/>                          |                                                      |
|                                                                              |                                                                            | Unavailability of a definitive cure <input type="checkbox"/>                   |                                                      |
|                                                                              |                                                                            | I just don't want to know <input type="checkbox"/>                             |                                                      |
|                                                                              |                                                                            | Not applicable <input type="checkbox"/>                                        |                                                      |
| 25                                                                           | Are you willing to get tested NOW?                                         | Yes <input type="checkbox"/>                                                   | No <input type="checkbox"/>                          |
| 26                                                                           | If YES, why?                                                               | I am at risk <input type="checkbox"/>                                          | History of rape <input type="checkbox"/>             |
|                                                                              |                                                                            | I will be getting married soon <input type="checkbox"/>                        |                                                      |
|                                                                              |                                                                            | I am curious <input type="checkbox"/>                                          | Don't know why <input type="checkbox"/>              |
| 27                                                                           | If NO, why?                                                                | There is no cure and so it makes no difference <input type="checkbox"/>        |                                                      |
|                                                                              |                                                                            | I can never get infected <input type="checkbox"/>                              |                                                      |
|                                                                              |                                                                            | I don't care <input type="checkbox"/>                                          | Don't know why <input type="checkbox"/>              |
| 28                                                                           | Will you be willing to get tested should a healthcare provider ask you to? | Yes <input type="checkbox"/>                                                   | No <input type="checkbox"/>                          |
| <b>SECTION D: OTHER FACTORS THAT MAY INFLUENCE WILLINGNESS TO GET TESTED</b> |                                                                            |                                                                                |                                                      |
| <i>Please tick only the options that apply to you</i>                        |                                                                            |                                                                                |                                                      |
| 29                                                                           | Have you ever had sexual intercourse?                                      | Yes <input type="checkbox"/>                                                   | No <input type="checkbox"/>                          |
| 30                                                                           | Age of first sexual encounter (years)                                      | .....                                                                          | Not applicable <input type="checkbox"/>              |
| 31                                                                           | Did you use a condom on your first encounter?                              | Yes <input type="checkbox"/>                                                   | No <input type="checkbox"/>                          |
|                                                                              |                                                                            |                                                                                | Not applicable <input type="checkbox"/>              |
| 32                                                                           | If NO, why?                                                                | I didn't know where to buy it <input type="checkbox"/>                         |                                                      |
|                                                                              |                                                                            | I couldn't afford it <input type="checkbox"/>                                  |                                                      |

Code: .....

Initials: .....

Date: ... / ... / .....

|    |                                            |                                                       |                          |                          |                          |                |                          |
|----|--------------------------------------------|-------------------------------------------------------|--------------------------|--------------------------|--------------------------|----------------|--------------------------|
| 32 | If NO, why?                                | I thought my partner would bring one along            | <input type="checkbox"/> |                          |                          |                |                          |
|    |                                            | I was shy of going to buy one                         | <input type="checkbox"/> |                          |                          |                |                          |
|    |                                            | I was a novice and knew nothing about condoms and sex |                          | <input type="checkbox"/> |                          |                |                          |
|    |                                            | Having sex on that day was unplanned                  | <input type="checkbox"/> |                          |                          |                |                          |
|    |                                            | I just didn't think it was necessary                  | <input type="checkbox"/> |                          |                          |                |                          |
|    | Not applicable                             | <input type="checkbox"/>                              |                          |                          |                          |                |                          |
| 33 | Do you use condoms now?                    | Yes                                                   | <input type="checkbox"/> | No                       | <input type="checkbox"/> | Not applicable | <input type="checkbox"/> |
| 34 | Do you know an HIV/AIDS person personally? | Yes                                                   | <input type="checkbox"/> | No                       | <input type="checkbox"/> |                |                          |

Thank you!
